# Supplementary material for: Constitutive localization of DR4 in lipid rafts is mandatory for TRAIL-induced apoptosis in B-cell hematologic malignancies
Source: PubMed Central journal article supplement — Cell Death Dis. 2013 Oct 17;4(10):e863–. doi: 10.1038/cddis.2013.389 (PMC3920963; doi:10.1038/cddis.2013.389), 2013-10-17
Supplement: cddis2013389x3.pdf [file cddis2013389x3.pdf]

## RAMOS

anti DR4 (RD) goat > anti goat-PE (Sigma)

Cholera toxin-biotin (Invitrogen) > streptavidin-Cy5 (Amersham)

### DR4/ CT

#### Untreated

|                  | FL-2 | FL-3 | FL-4 |      |
|------------------|------|------|------|------|
| neg-PE           |      | 0,8  | 1,6  | 1,1  |
| DR4-PE           |      | 2,9  | 3,1  | 1,4  |
| neg-Cy5          |      | 2,8  | 3,8  | 3,3  |
| CT-Cy5           |      | 3,4  | 4,6  | 69,8 |
| neg-PE + neg-Cy5 |      | 3,2  | 3,1  | 4,2  |
| DR4-PE + CT-Cy5  |      | 2,5  | 81,4 | 31,3 |

|                 | FL-2 | FL-3 | FL-4 | a    | b   |
|-----------------|------|------|------|------|-----|
| DR4-PE          |      | 2,1  | 1,5  | 0,3  | 1,4 |
| CT-Cy5          |      | 0,6  | 0,8  | 66,5 |     |
| DR4-PE + CT-Cy5 |      | -0,7 | 78,3 | 27,1 |     |

83,125

#### FRET

1,00222203

#### Perifosine

|                  | FL-2 | FL-3 | FL-4 |      |
|------------------|------|------|------|------|
| neg-PE           |      | 2,5  | 2,7  | 2,1  |
| DR4-PE           |      | 2,7  | 1,5  | 0,9  |
| neg-Cy5          |      | 1    | 2,9  | 2,1  |
| CT-Cy5           |      | 1,3  | 3,2  | 71,4 |
| neg-PE + neg-Cy5 |      | 0,8  | 4,8  | 1,9  |
| DR4-PE + CT-Cy5  |      | 5,8  | 84,9 | 15,9 |

|                | FL-2 | FL-3 | FL-4 | a    | b            |
|----------------|------|------|------|------|--------------|
| DR4-PE         |      | 0,2  | -1,2 | -1,2 | -0,166666667 |
| CT-Cy5         |      | 0,3  | 0,3  | 69,3 |              |
| DR4-PE +CT-Cy5 |      | 5    | 80,1 | 14   |              |

231

#### FRET

1,37377521

## Namalwa

anti DR4 (RD) goat > anti goat-PE (Sigma)

Cholera toxin-biotin (Invitrogen)> streptavidin-Cy5 (Amersham)

### DR4/ CT

#### Untreated

|                | FL-2 | FL-3 | FL-4 |      |
|----------------|------|------|------|------|
| neg-PE         |      | 1    | 2    | 1,7  |
| DR4-PE         |      | 6,6  | 3,7  | 2,1  |
| neg-Cy5        |      | 3    | 4    | 2,6  |
| CT-Cy5         |      | 3,2  | 4,3  | 73,4 |
| neg-PE + neg-C |      | 2,8  | 3,5  | 3,2  |
| DR4-PE + CT-C  |      | 5,4  | 4,8  | 34,6 |

|               | FL-2 | FL-3       | FL-4       | a           | b                  | FRET              |
|---------------|------|------------|------------|-------------|--------------------|-------------------|
| DR4-PE        |      | 5,6        | 1,7        | 0,4         | <b>3,294117647</b> |                   |
| CT-Cy5        |      | 0,2        | 0,3        | 70,8        |                    | 236               |
| DR4-PE + CT-C |      | <b>2,6</b> | <b>1,3</b> | <b>31,4</b> |                    | <b>0,29051034</b> |

#### Perifosine

|                | FL-2 | FL-3 | FL-4 |      |
|----------------|------|------|------|------|
| neg-PE         |      | 1,2  | 1,9  | 2,3  |
| DR4-PE         |      | 6,8  | 3    | 2,6  |
| neg-Cy5        |      | 2,8  | 2,1  | 3    |
| CT-Cy5         |      | 2    | 3,4  | 75,1 |
| neg-PE + neg-C |      | 2,5  | 3,8  | 2,6  |
| DR4-PE + CT-C  |      | 6,5  | 5,7  | 30,2 |

|               | FL-2 | FL-3     | FL-4       | a           | b                  | FRET              |
|---------------|------|----------|------------|-------------|--------------------|-------------------|
| DR4-PE        |      | 5,6      | 1,1        | 0,3         | <b>5,090909091</b> |                   |
| CT-Cy5        |      | -0,8     | 1,3        | 72,1        |                    | 55,46153846       |
| DR4-PE +CT-Cy |      | <b>4</b> | <b>1,9</b> | <b>27,6</b> |                    | <b>0,32454924</b> |

## PBL

anti DR4 (RD) goat > anti goat-PE (Sigma)

Cholera toxin-biotin (Invitrogen) > streptavidin-Cy5 (Amersham)

### DR4/ CT

#### Untreated

|                | FL-2 | FL-3 | FL-4 |  |
|----------------|------|------|------|--|
| neg-PE         | 2,1  | 3,8  | 3    |  |
| DR4-PE         | 7,7  | 2,2  | 2,8  |  |
| neg-Cy5        | 2,1  | 2    | 2,1  |  |
| CT-Cy5         | 3,1  | 4,5  | 83,6 |  |
| neg-PE + neg-C | 1,4  | 3,5  | 2,9  |  |
| DR4-PE + CT-C  | 7,6  | 4    | 76,9 |  |

|               | FL-2 | FL-3 | FL-4 | a | b    | FRET       |
|---------------|------|------|------|---|------|------------|
| DR4-PE        | 5,6  | -1,6 | -0,2 |   | -3,5 |            |
| CT-Cy5        | 1    | 2,5  | 81,5 |   |      | 32,6       |
| DR4-PE + CT-C | 6,2  | 0,5  | 74   |   |      | 0,00297984 |

#### Perifosine

|                | FL-2 | FL-3 | FL-4 |  |
|----------------|------|------|------|--|
| neg-PE         | 2,3  | 3,5  | 2    |  |
| DR4-PE         | 7,9  | 2    | 2,4  |  |
| neg-Cy5        | 2,6  | 2,5  | 2,1  |  |
| CT-Cy5         | 2,9  | 5,1  | 74,6 |  |
| neg-PE + neg-C | 1,7  | 3    | 2    |  |
| DR4-PE + CT-C  | 7,8  | 3,8  | 69,8 |  |

|                | FL-2 | FL-3 | FL-4 | a            | b           | FRET       |
|----------------|------|------|------|--------------|-------------|------------|
| DR4-PE         | 5,6  | -1,5 | 0,4  | -3,733333333 |             |            |
| CT-Cy5         | 0,3  | 2,6  | 72,5 |              | 27,88461538 |            |
| DR4-PE + CT-Cy | 6,1  | 0,8  | 67,8 |              |             | 0,00310037 |
