# Supplementary material for: Constitutive localization of DR4 in lipid rafts is mandatory for TRAIL-induced apoptosis in B-cell hematologic malignancies
Source: PubMed Central journal article supplement — Cell Death Dis. 2013 Oct 17;4(10):e863–. doi: 10.1038/cddis.2013.389 (PMC3920963; doi:10.1038/cddis.2013.389), 2013-10-17
Supplement: cddis2013389x4.pdf [file cddis2013389x4.pdf]

## RAMOS

anti DR5 (RD) goat > anti goat-PE (Sigma)

anti GM3 > streptavidin-Cy5 (Amersham)

### DR5/GM3

#### Untreated

|                  | FL-2 | FL-3 | FL-4 |      |
|------------------|------|------|------|------|
| neg-PE           |      | 1,6  | 1,4  | 0,9  |
| DR5-PE           |      | 6,4  | 2,5  | 2    |
| neg-Cy5          |      | 1,4  | 1,9  | 3,2  |
| CT-Cy5           |      | 2,64 | 3,4  | 71,3 |
| neg PE + neg Cy5 |      | 3,62 | 2    | 3    |
| DR5-PE + CT-Cy5  |      | 6,9  | 3,9  | 54,9 |

|                 | FL-2 | FL-3 | FL-4 | a    | b           |
|-----------------|------|------|------|------|-------------|
| DR5-PE          |      | 4,8  | 1,1  | 1,1  | 4,363636364 |
| CT-Cy5          |      | 1,24 | 1,5  | 68,1 |             |
| DR5-PE + CT-Cy5 |      | 3,28 | 1,9  | 51,9 |             |

| FRET       |
|------------|
| 45,4       |
| 0,00271659 |

#### Perifosine

|                  | FL-2 | FL-3 | FL-4 |      |
|------------------|------|------|------|------|
| neg-PE           |      | 1,9  | 5,8  | 1    |
| DR5-PE           |      | 6,3  | 3,3  | 2,2  |
| neg-Cy5          |      | 2,1  | 2,5  | 2,7  |
| CT-Cy5           |      | 3,2  | 2,7  | 65,5 |
| neg PE + neg Cy5 |      | 3,1  | 2,6  | 0,6  |
| DR5-PE +CT-Cy5   |      | 7,7  | 0,1  | 38,8 |

|                | FL-2 | FL-3 | FL-4 | a    | b     |
|----------------|------|------|------|------|-------|
| DR5-PE         |      | 4,4  | -2,5 | 1,2  | -1,76 |
| CT-Cy5         |      | 1,1  | 0,2  | 62,8 |       |
| DR5-PE +CT-Cy5 |      | 4,6  | -2,5 | 38,2 |       |

| FRET       |
|------------|
| 314        |
| 0,00320787 |

## NANALWA

anti DR5 (RD) goat > anti goat-PE (Sigma)

anti GM3 > streptavidin-Cy5 (Amersham)

### DR5/GM3

#### Untreated

|                  | FL-2 | FL-3 | FL-4 |      |
|------------------|------|------|------|------|
| neg-PE           |      | 1,5  | 2    | 2,1  |
| DR5-PE           |      | 5,3  | 2,7  | 3    |
| neg-Cy5          |      | 1,9  | 2,3  | 3    |
| CT-Cy5           |      | 2,2  | 2,9  | 71,4 |
| neg PE + neg Cy5 |      | 5,6  | 3,1  | 3,7  |
| DR5-PE + CT-Cy5  |      | 4,3  | 3,5  | 76,4 |

|                 | FL-2 | FL-3 | FL-4 | a    | b           |
|-----------------|------|------|------|------|-------------|
| DR5-PE          |      | 3,8  | 0,7  | 0,9  | 5,428571429 |
| CT-Cy5          |      | 0,3  | 0,6  | 68,4 |             |
| DR5-PE + CT-Cy5 |      | -1,3 | 0,4  | 72,7 |             |

| FRET       |
|------------|
| 114        |
| 0,00438596 |

#### Perifosine

|                  | FL-2 | FL-3 | FL-4 |      |
|------------------|------|------|------|------|
| neg-PE           |      | 1,9  | 5,8  | 1    |
| DR5-PE           |      | 6,3  | 3,3  | 2,2  |
| neg-Cy5          |      | 2,1  | 2,5  | 2,7  |
| CT-Cy5           |      | 3,2  | 2,7  | 65,5 |
| neg PE + neg Cy5 |      | 3,1  | 2,6  | 0,6  |
| DR5-PE +CT-Cy5   |      | 7,7  | 0,1  | 38,8 |

|                | FL-2 | FL-3 | FL-4 | a    | b     |
|----------------|------|------|------|------|-------|
| DR5-PE         |      | 4,4  | -2,5 | 1,2  | -1,76 |
| CT-Cy5         |      | 1,1  | 0,2  | 62,8 |       |
| DR5-PE +CT-Cy5 |      | 4,6  | -2,5 | 38,2 |       |

| FRET       |
|------------|
| 314        |
| 0,00320787 |

## PBL

anti DR5 (RD) goat > anti goat-PE (Sigma)

anti GM3 > streptavidin-Cy5 (Amersham)

### DR5/ GM3

#### Untreated

|                             | FL-2 | FL-3 | FL-4 |  |
|-----------------------------|------|------|------|--|
| neg-PE                      | 1,5  | 2    | 2,5  |  |
| DR5-PE                      | 5,3  | 2,7  | 3    |  |
| neg-Cy5                     | 1,9  | 2,3  | 3,1  |  |
| CT-Cy5                      | 2,2  | 2,9  | 71,4 |  |
| neg PE + neg C <sub>5</sub> | 5,6  | 3,1  | 3,7  |  |
| DR5-PE + CT-C <sub>5</sub>  | 4,3  | 3,5  | 76,4 |  |

|                            | FL-2 | FL-3 | FL-4 | a           | b           | FRET       |
|----------------------------|------|------|------|-------------|-------------|------------|
| DR5-PE                     | 3,8  | 0,7  | 0,5  | 5,428571429 |             |            |
| CT-Cy5                     | 0,3  | 0,6  | 68,3 |             | 113,8333333 |            |
| DR5-PE + CT-C <sub>5</sub> | -1,3 | 0,4  | 72,7 |             |             | 0,00205171 |

#### Perifosine

|                             | FL-2 | FL-3 | FL-4 |  |
|-----------------------------|------|------|------|--|
| neg-PE                      | 2    | 5,6  | 3    |  |
| DR5-PE                      | 7,8  | 2,8  | 3,8  |  |
| neg-Cy5                     | 3    | 3    | 3,6  |  |
| CT-Cy5                      | 3,5  | 3,4  | 79,8 |  |
| neg PE + neg C <sub>5</sub> | 4,1  | 3,9  | 3,1  |  |
| DR5-PE +CT-Cy               | 8,4  | 2    | 39,2 |  |

|               | FL-2 | FL-3 | FL-4 | a            | b     | FRET       |
|---------------|------|------|------|--------------|-------|------------|
| DR5-PE        | 5,8  | -2,8 | 0,8  | -2,071428571 |       |            |
| CT-Cy5        | 0,5  | 0,4  | 76,2 |              | 190,5 |            |
| DR5-PE +CT-Cy | 4,3  | -1,9 | 36,1 |              |       | 0,00717855 |
